# Supplementary material
Source: PubMed Central journal article supplement (PMC4772599)
Supplement: JB.00832-15_zjb999093958so3.pdf [file JB.00832-15_zjb999093958so3.pdf]

# Figure S1

A.

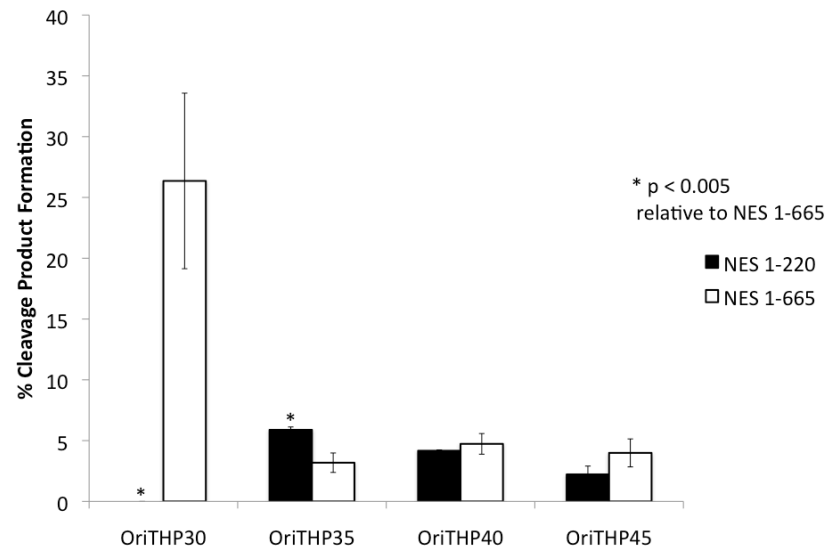

B.

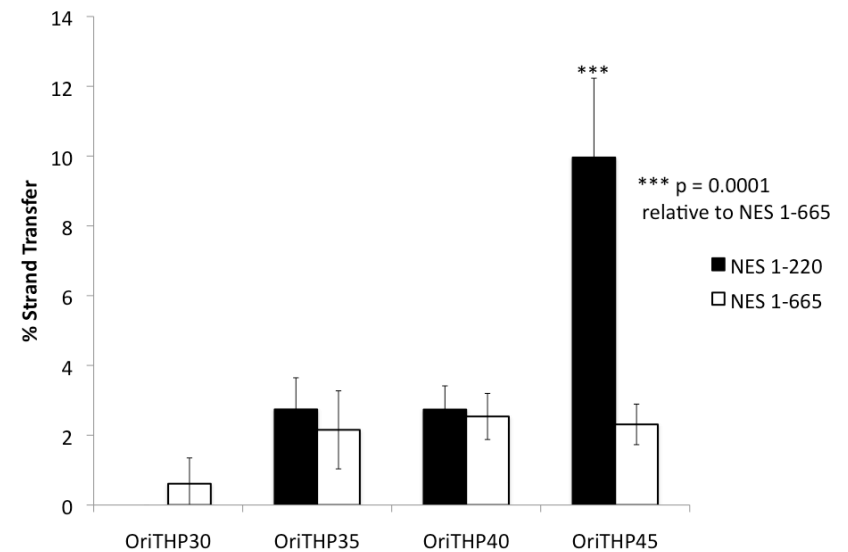

## Supplemental Figure S1. Cleavage and Strand Transfer by Relaxase Domain and Full-length NES.

- Effect of oligonucleotide length on cleavage by NES 1-220 (relaxase domain) and NES 1-665 (full-length) protein. Data for NES 1-665 is the same as presented in Figure 2C.
- Effect of oligonucleotide length on strand transfer by NES 1-220 (relaxase domain) and NES 1-665 (full-length) protein. Data for NES 1-66 is the same as presented in Figure 2D.

Figure S2

A.

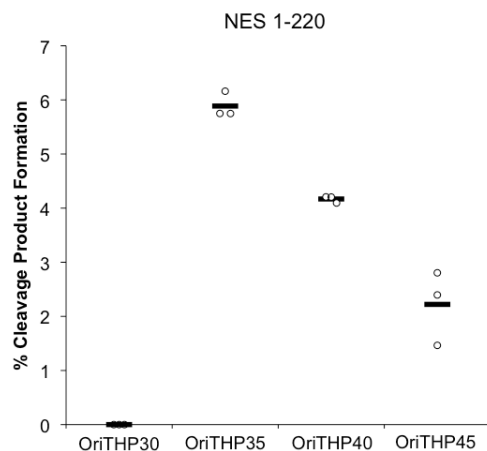

B.

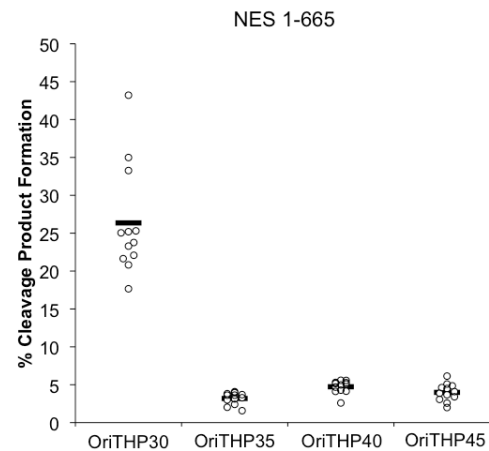

C.

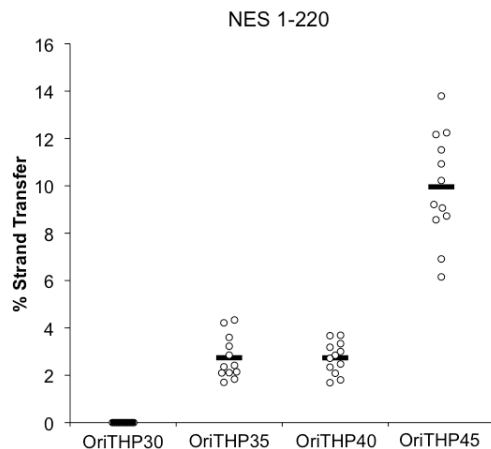

D.

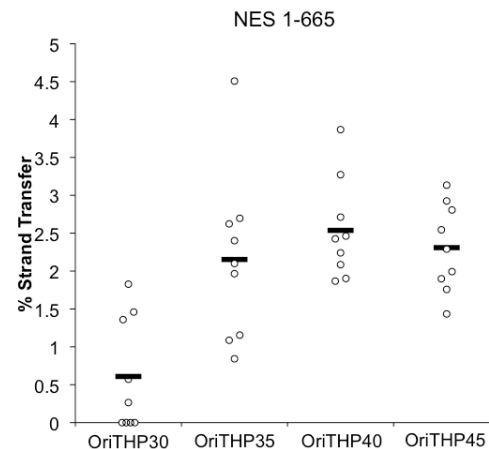

**Supplemental Figure S2. Cleavage and Strand Transfer by Relaxase Domain and Full-length NES.**

- A. Individual data points for the effect of oligonucleotide length on cleavage by NES 1-220 (relaxase domain) protein as shown in Figure S1.
- B. Individual data points for the effect of oligonucleotide length of cleavage by NES 1-665 (full-length) protein as shown in Figure S1. Data is the same as presented in Figure S3.
- C. Individual data points for the effect of oligonucleotide length on strand transfer by NES 1-220 (relaxase domain) protein as shown in Figure S1.
- D. Individual data points for the effect of oligonucleotide length on strand transfer by NES 1-665 (full-length) protein as shown in Figure S1. Data is the same as presented in Figure S4.

Figure S3

A.

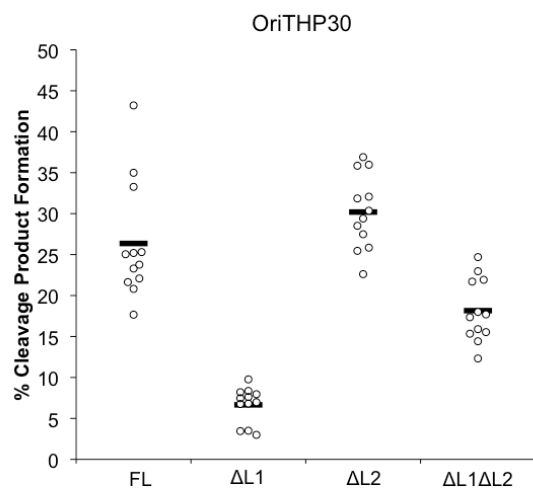

B.

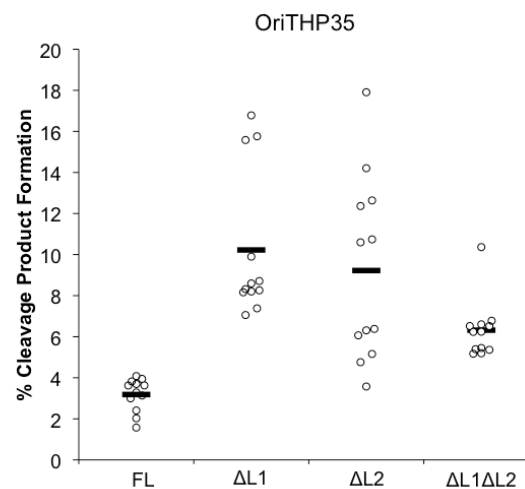

C.

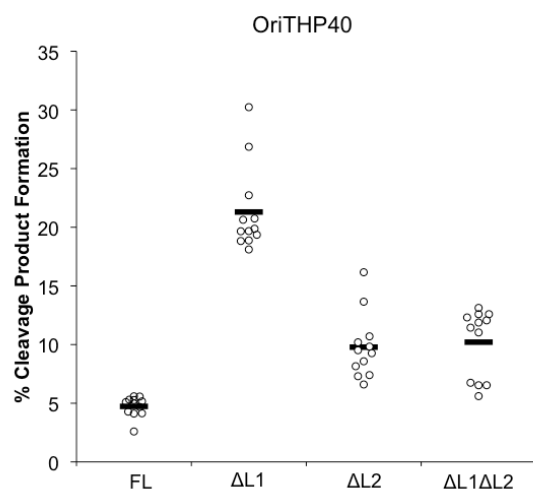

D.

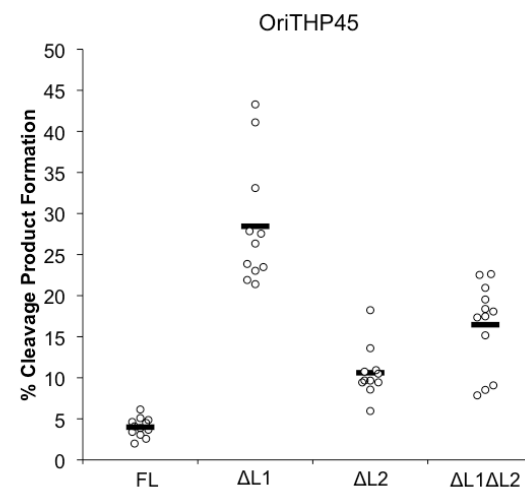

**Supplemental Figure S3. Cleavage by NES Loop Deletion Mutants.**

- A. Cleavage activity of NES mutants on OriTHP30 as shown in Figure 2C.
- B. Cleavage activity of NES mutants on OriTHP35 as shown in Figure 2C.
- C. Cleavage activity of NES mutants on OriTHP40 as shown in Figure 2C.
- D. Cleavage activity of NES mutants on OriTHP45 as shown in Figure 2C.

Figure S4

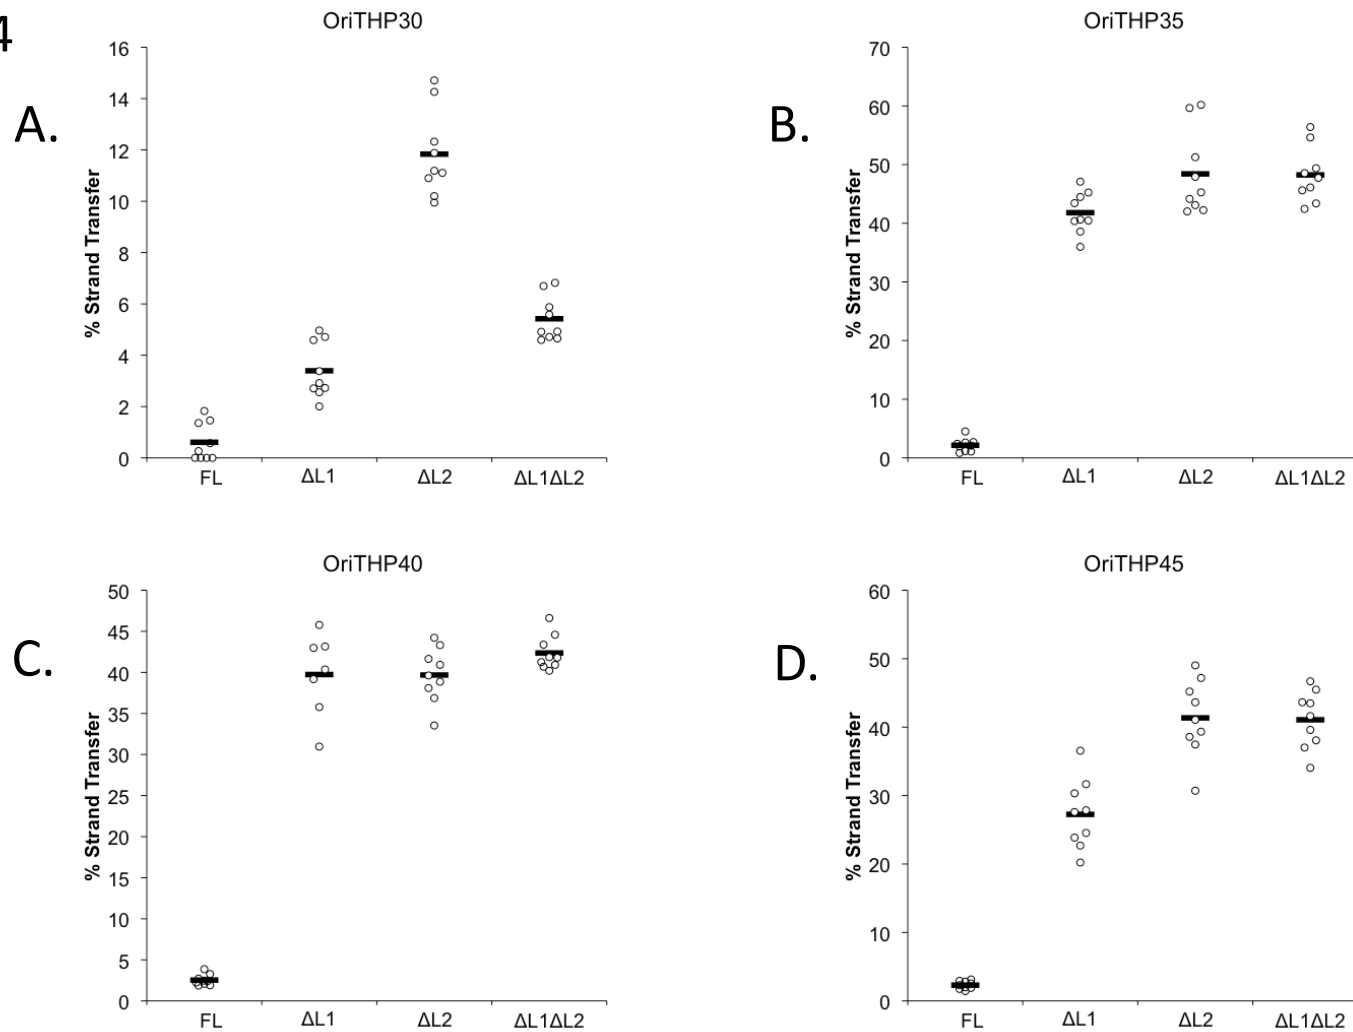

**Supplemental Figure S4. Strand Transfer by NES Loop Deletion Mutants.**

- A. Strand transfer activity of NES mutants on OriTHP30 as shown in Figure 2D.
- B. Strand transfer activity of NES mutants on OriTHP35 as shown in Figure 2D.
- C. Strand transfer activity of NES mutants on OriTHP40 as shown in Figure 2D.
- D. Strand transfer activity of NES mutants on OriTHP45 as shown in Figure 2D.

Figure S5

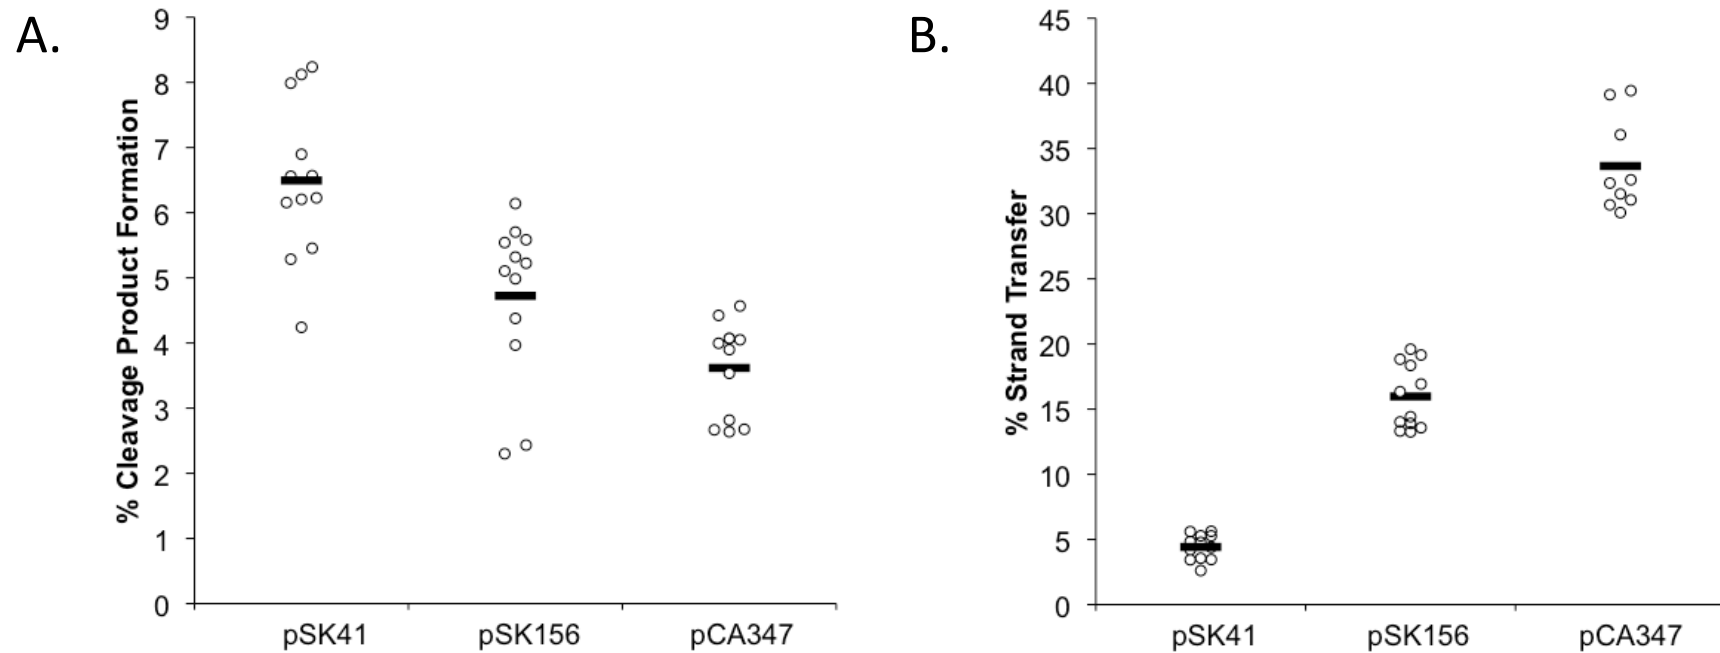

**Supplemental Figure S5. Cleavage and Strand Transfer Processing of pSK41, pSK156, and pCA347 *oriT* Oligonucleotides.**

- A. Cleavage activity of the pSK41-encoded NES protein on the pSK41, pSK156, and pCA347 *oriTs* as shown in Figure 4B.
- B. Strand transfer activity of the pSK41-encoded NES protein on the pSK41, pSK156, and pCA347 *oriTs* as shown in Figure 4C.

## Figure S6

### pSK41 *oriT*-string

cccaagcttAGC**ACGCGAACGGAACGTTTCGCATAAGTGCGCCCTTACGGGAT**TTAACTAGATTATAACGG  
TAAACTTGAATCTGTCAAACGAAggatccgc

### pSK156 *oriT*-string

gatcggatccTTTTTCTTTCGACGCCGTATCGTCGATGTAATTCAAAAAGTTATGGGCTATAAATCTAC  
ATCACTTTTTCAAGAATGTAGTAGCAATATTC AACGCAAATTAATTTTTATAACTGCTCGGAATATCTCA  
AGCCGTTTCTTTAATTTTGAAATAAAAAAATCGACGAAGGTCGATTACGTTTTTGTAC**ACGTCGATTTA**  
**TCCGACGTATAAGTGCGCCCTTACGGGAT**TTAACTAGATTATAACGACGAATTTTAGACCTGTAAAGCAA  
Tggtaccaagcttggatccgatc

### pCA347 *oriT*-string

gatcggatccTTTTTCTTTCGACGCCGTATCGTCGATGTAATTCAAAAAGTTATGGGCTATAAATCTAC  
ATCACTTTTTCAAGAATGTAGTAGCAATATTC AACGCAAATTAATTTTTATAACTGCTCGGAATATCTCA  
AGCCGTTTCTTTAATTTTGAAATAAAAAAATCGACGAAGGTCGATTACGTTTTTGCAC**ATGTCGATTTAT**  
**CCGACGTATAAGTGCGCCCTTACGGGAT**TTAACTAGATTATAACGACGAATTTTAGACCTGTAAAGCAAT  
ggtaccaagcttggatccgatc

**Supplemental Figure S6. Nucleotide Sequences for *in vivo* Transfer Assays.** Nucleotide sequences of the GeneArt Strings (Invitrogen) encompassing the *oriT* regions of plasmids pSK41 (GenBank Acc. AF051917, nt 10189-10273), pSK156 (GenBank Acc GQ900448, nt 13396-13126) and pCA347 (GenBank Acc. CP006045, nt 3825-4094). Sequences in lower case were added to the DNA fragments to facilitate cloning and the *Bam*HI and *Hind*III restriction sites used are underlined. Sequence in bold correlates to the oligonucleotide *oriTs* shown in Fig. 3A.

## Supplemental Table S1. Bacterial strains and plasmids used in this study

| Strain or plasmid            | Description <sup>a</sup>                                                                                                              | Reference or source             |
|------------------------------|---------------------------------------------------------------------------------------------------------------------------------------|---------------------------------|
| <i>Escherichia coli</i>      |                                                                                                                                       |                                 |
| DH5 $\alpha$                 | F <sup>-</sup> <i>endA hsdR17 supE44 thi-1 <math>\lambda</math> recA1 gyrA96 relA1 <math>\phi</math>80 dlacZAM15</i>                  | Bethesda Research Laboratories  |
| BL21(DE3)                    | F <sup>-</sup> <i>ompT hsdSB (r<sub>B</sub><sup>-</sup> m<sub>B</sub><sup>-</sup>) dcm gal <math>\lambda</math>(DE3)</i>              | Novagen                         |
| <i>Staphylococcus aureus</i> |                                                                                                                                       |                                 |
| RN4220                       | Restriction-deficient derivative of NCTC8325-4                                                                                        | Kreiswirth <i>et al.</i> , 1983 |
| SK5428                       | SK982 harboring pSK41                                                                                                                 | Lyon <i>et al.</i> , 1984       |
| WBG541                       | Sm <sup>R</sup> /Nb <sup>R</sup> derivative of NCTC8325-4                                                                             | Townsend <i>et al.</i> , 1983   |
| WBG4515                      | Fs <sup>R</sup> /Rf <sup>R</sup> derivative of NCTC8325-4                                                                             | Townsend <i>et al.</i> , 1983   |
| Plasmids                     |                                                                                                                                       |                                 |
| pSK41                        | Gm <sup>R</sup> , Tb <sup>R</sup> , Km <sup>R</sup> , Nm <sup>R</sup> , <i>tra</i> <sup>+</sup> , conjugative multiresistance plasmid | Berg <i>et al.</i> , 1998       |
| pSK5632                      | pSK1-based <i>S. aureus</i> (Cm <sup>R</sup> )/ <i>E. coli</i> (Ap <sup>R</sup> ) shuttle vector                                      | Grkovic <i>et al.</i> , 2003    |
| pSK6877                      | pSK41 <i>oriT</i> -string cloned into <i>Hind</i> III and <i>Bam</i> HI of pSK5632                                                    | This study                      |
| pSK6879                      | pCA347 <i>oriT</i> -string cloned into <i>Bam</i> HI of pSK5632                                                                       | This study                      |
| pSK6881                      | pSK156 <i>oriT</i> -string cloned into <i>Bam</i> HI of pSK5632                                                                       | This study                      |

<sup>a</sup> Sm<sup>R</sup>, streptomycin resistance; Nb<sup>R</sup>, novobiocin resistance; Fs<sup>R</sup>, fusidic acid resistance; Rf<sup>R</sup>, rifampin resistance; Gm<sup>R</sup>, gentamycin resistance; Tb<sup>R</sup>, tobramycin resistance; Km<sup>R</sup>, kanamycin resistance; Nm<sup>R</sup>, neomycin resistance; Cm<sup>R</sup>, chloramphenicol resistance; Ap<sup>R</sup>, ampicillin resistance; *tra*<sup>+</sup> conjugative transfer genes.

### References:

Kreiswirth, B.N., Lofdahl, S., Betley, M.J., O'Reilly, M., Schlievert, P.M., Bergdoll, M.S., and Novick, R.P. (1983) The toxic shock syndrome exotoxin structural gene is not detectably transmitted by a prophage. *Nature* 305:709-712.

Lyon, B.R., May, J.W., and Skurray, R.A. (1984) Tn4001: a gentamicin and kanamycin resistance transposon in *Staphylococcus aureus*. *Mol. Gen. Genet.* 193:554-556.

Townsend, D.E., Grubb, W.B. and Ashdown, N. (1983) Gentamicin resistance in methicillin-resistant *Staphylococcus aureus*. *Pathology*, **15**, 169-174.

Berg, T., Firth, N., Apisiridej, S., Hettiaratchi, A., Leelaporn, A., and Skurray, R.A. (1998) Complete nucleotide sequence of pSK41: evolution of staphylococcal conjugative multiresistance plasmids. *J. Bacteriol.* 180:4350-4359.

Grkovic, S., Brown, M.H., Hardie, K.M., Firth, N., and Skurray, R.A. (2003) Stable low-copy-number *Staphylococcus aureus* shuttle vectors. *Microbiol.* 149:785-794.
